# Supplementary material for: Macrophages eliminate circulating tumor cells after monoclonal antibody therapy
Source: JCI journal article supplement (doi:10.1172/jci66776), 2014-01-15
Supplement: sd1 [file 1]

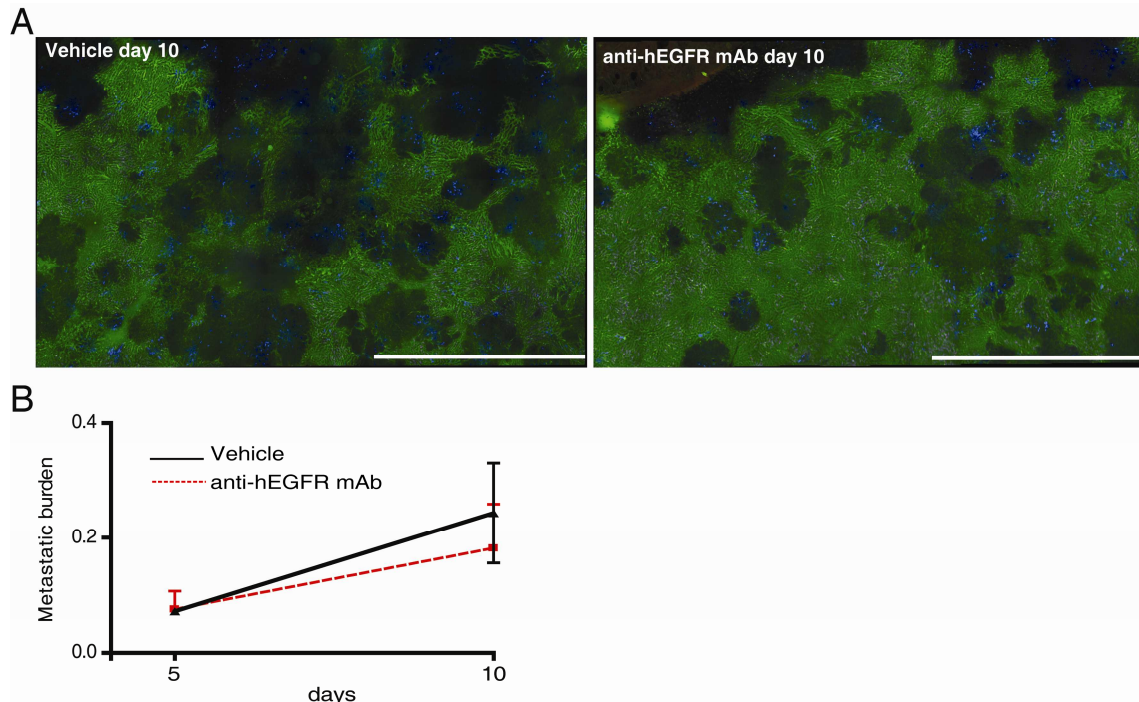

**Supplemental figure 1:** Antibody treatment is not successful in eliminating existing liver metastases. **(A)** Representative images from livers of mice that were injected with C26-hEGFR cells and received every 48h injections with vehicle (left panel) or anti-hEGFR mAbs (right panel). Unperfused (dark patches) area of the liver indicate metastases. Scale bars: 1.36 mm. **B:** Quantification of metastatic burden in livers of mice over 10 days.
